# Supplementary material
Source: PubMed Central journal article supplement (PMC10173100)
Supplement: jamadermatol-e231108-s001.pdf [file jamadermatol-e231108-s001.pdf]

## Data Sharing Statement

Mann. Assessment of Cutaneous Vasculitis and Quality of Life. *JAMA Dermatol.* Published May 10, 2023. doi:10.1001/jamadermatol.2023.1108

### Data

**Data available:** Yes

**Data types:** Deidentified participant data

**How to access data:** [robert.micheletti@pennmedicine.upenn.edu](mailto:robert.micheletti@pennmedicine.upenn.edu)

**When available:** With publication

### Supporting Documents

**Document types:** None

### Additional Information

**Who can access the data:** researchers whose proposed use of the data has been approved

**Types of analyses:** for any purpose

**Mechanisms of data availability:** with a signed data access agreement
